# Supplementary material for: Regulatory landscape enrichment analysis (RLEA): a computational toolkit for non-coding variant enrichment and cell type prioritization
Source: Springer Nature journal article supplement (doi:10.1186/s12859-024-05794-7), 2024-05-07
Supplement: 12859_2024_5794_MOESM1_ESM.pdf [file 12859_2024_5794_MOESM1_ESM.pdf]

**Additional File 1: GaiaAssociation source code. This python notebook file (.ipynb) includes the functional source code required to run GaiaAssociation.**

---

```
1  ##import necessary libraries
2  import pandas as pd
3  import pyranges as pr
4  import numpy as np
5  import matplotlib.pyplot as plt
6  from collections import defaultdict
7  import operator
8  import scipy
9  from scipy.cluster.hierarchy import dendrogram, leaves_list
10 import scipy.spatial.distance as ssd
11 import os, glob
12 import sys
13 import seaborn as sns
14 import statistics
15 import math
16 import argparse
17 from scipy.optimize import root
18 from scipy.stats import norm
19 import warnings
20
21
22 #####
23
24 ##### Gaia Association:
25
26 ##### Compare chromatin accessibility data (e.g. ATAC-seq, DNase-seq)
27 ... against loci sets (e.g. de-novo mutations, SNPs, rare variants) to detect
28 ... cell-specific enrichment of loci.
29
30 #####
31
32
33 ##Primary function for associating ATAC and GWAS
34 def gaiaAssociation(atacLocation, gwasLocation, chromosomeSize,
35 ... outputLocation, uniqueCount=0, lociCutoff=0, lociSelection = 0,
36 ... subsettingRegion=0, windowSize = 100000):
37
38     ## ensure all the given locations and files are accesible and real
39     if not os.path.exists(atacLocation):
40         sys.exit("Cell region folder cannot be found")
41     if not os.path.exists(gwasLocation):
42         sys.exit("Loci folder cannot be found")
43     if not os.path.exists(chromosomeSize):
44         sys.exit("Chrom size file cannot be found")
```

```
43     if not os.path.exists(outputLocation):
44         print("Output folder cannot be found, attempting to build it:")
45         os.mkdir(outputLocation)
46         if not os.path.exists(outputLocation):
47             sys.exit("Output folder cannot be built")
48         else:
49             print("Output folder succesfully built:")
50
51     ## pyranges is a slightly outdated method and receives warnings about
... not properly identifying true or false values in certain instances
52     warnings.filterwarnings('ignore', module='pyranges')
53
54     ##Bring in our atac files for each cell type
55     dataframeList = []
56     cellNames = []
57     for filename in glob.glob(atacLocation + "/" + '*.txt'):
58
59         loopFrame = pd.read_csv(filename, sep="\t")
60
61         ##this checks if there was no header, if the first column name is
... chr1, it shifts columns down into a row
62         if "chr1" in loopFrame.columns[0] or "Chr1" in
... loopFrame.columns[0]:
63             columnFrame = loopFrame.columns.to_frame().T
64             loopFrame = pd.concat([columnFrame, loopFrame],
... ignore_index=True)
65
66         ##Gives first three columns the names 'Chromosome', 'Start',
... "End"
67         loopFrame = loopFrame.rename({loopFrame.columns[0] :
... 'Chromosome', loopFrame.columns[1] : 'Start', loopFrame.columns[2] :
... "End"}, axis=1)
68
69         ##ensure start and stop are numeric values
70         loopFrame["Start"] = pd.to_numeric(loopFrame["Start"])
71         loopFrame["End"] = pd.to_numeric(loopFrame["End"])
72
73         ##ensure the chromosome id doesnt have white space and is the
... string datatype
74         loopFrame['Chromosome'] = loopFrame['Chromosome'].str.strip()
75         loopFrame['Chromosome'] = loopFrame['Chromosome'].astype(str)
76
77         ##add this dataframe to our list of atac-sets
78         dataframeList.append(loopFrame)
79
80         ##Save cell type names by formatting the file names
```

```
81     s = filename[:-4]
82     cellNames.append(s[s.rindex('/')+1:])
83
84     if(len(dataFrameList)==0):
85         sys.exit("No Cell region files found")
86
87     ##do some light formating to ensure all atac-seq have the same
... labeling
88     for i in range(len(dataFrameList)):
89         if "seqnames" in dataFrameList[i].columns:
90             dataFrameList[i] =
... dataFrameList[i].rename(columns={"seqnames": "chr"})
91             if "chr" in dataFrameList[i].columns:
92                 dataFrameList[i] = dataFrameList[i].rename(columns={"chr":
... "Chromosome"})
93             if "start" in dataFrameList[i].columns:
94                 dataFrameList[i] = dataFrameList[i].rename(columns={"start":
... "Start"})
95             if "end" in dataFrameList[i].columns:
96                 dataFrameList[i] = dataFrameList[i].rename(columns={"end":
... "End"})
97
98             ##ensure there is a size column and a Size column, this
... redundancy exists because of different package dependencies request for
... formatting
99             dataFrameList[i]["Size"] = dataFrameList[i]["End"] -
... dataFrameList[i]["Start"]
100
101             ##create an empty matrix to store our associations in
102             matrix1 = np.zeros((len(dataFrameList),len(dataFrameList)))
103
104             print("Formatting Cell Regions: ")
105
106             ##create list to store our pyRanges objects in, merge them to ensure
... regions arent double represented
107             prRanges = []
108             for i in range(len(dataFrameList)):
109
110                 ##this particular bit of circular coding creates a pyrange,
... merges itself to remove redundancy, turns it back into a dataframe,
... creates a size column, and then turns it back into a pyrange. This is
... because pyrange doesnt have a function to add a size column and merging
... removes the size column, this tedium is their fault, but it isn't super
... time intensive
111                 tempRange = pr.PyRanges(dataFrameList[i])
112                 loopRange = tempRange.merge(strand=False)
```

```
113     df = pd.DataFrame(list(zip(loopRange.Chromosome, loopRange.Start,
... loopRange.End)), columns = ['Chromosome', 'Start', 'End'])
114     df["Size"] = df["End"] - df["Start"]
115     testRange = pr.PyRanges(df)
116     prRanges.append(testRange)
117
118     if uniqueCount != 0:
119
120         ## Create unique sets of ATAC based on a cutoff value of number
... of overlaps
121         overlapCutoff = int(uniqueCount)
122
123         ##create New locations to store unique regions
124         prRangesUnique = []
125         prFrames = []
126
127         ##save the current dataframes to new location for altering (this
... may be redundant based on python memory handling)
128         print("Finding Unique Cell Region Peaks Between Cell Types:")
129         for j in range(len(prRanges)):
130             prFrames.append(prRanges[j].df)
131
132         ##Loop through each atac set and compare against all others,
... remove locations with overlaps greater than overlap cutoff
133         for j in range(len(prFrames)):
134
135             if( j != len(prFrames) - 1):
136                 print("Cell Type " + str(j+1), end = " - ")
137                 testFrame = pd.concat(prFrames[:j] + prFrames[j+1 :])
138             else:
139                 print("Cell Type " + str(j+1), end = "\n")
140                 testFrame = pd.concat(prFrames[:j])
141
142
143
144                 allButMain = pr.PyRanges(testFrame)
145                 loopRange = prRanges[j].coverage(allButMain)
146                 mainFrame = loopRange.df
147                 mainFrame = mainFrame[mainFrame["NumberOverlaps"] <=
... overlapCutoff]
148                 mainFrame = mainFrame.drop(columns=['NumberOverlaps',
... 'FractionOverlaps'])
149                 mainRange = pr.PyRanges(mainFrame)
150                 prRangesUnique.append(mainRange)
151
152
```

```
153         if not os.path.exists(outputLocation + '/unique_regions'):
154             os.mkdir(outputLocation + '/unique_regions')
155             if not os.path.exists(outputLocation +
... '/unique_regions'):
156                 print("Output folder for new unique regions cannot be
... built")
157                 uniqueSave = False
158             else:
159                 uniqueSave = True
160         else:
161             uniqueSave = True
162
163         if uniqueSave == True:
164             mainFrame.to_csv(outputLocation + '/unique_regions' +
... '/unique_regions_' + cellNames[j][:10] + "_" + str(uniqueCount) +
... '.txt', sep='\t')
165
166
167         prRanges = prRangesUnique
168
169
170         ## If a merging region file is included then subset our ATAC sets
... using this region set
171         if subsettingRegion != 0:
172
173             print("Subsetting Cell Region Peaks Based on given mask region
... file:")
174
175             geneLocation = subsettingRegion
176             geneFrame = pd.read_csv(geneLocation, sep="\t")
177
178             geneFrame = geneFrame.rename(columns={"Chr": "Chromosome",
... "start": "Start", "end" : "End"})
179
180             geneRange = pr.PyRanges(geneFrame)
181
182             if "seqnames" in geneFrame.columns:
183                 geneFrame = geneFrame.rename(columns={"seqnames": "chr"})
184             if "chr" in geneFrame.columns:
185                 geneFrame = geneFrame.rename(columns={"chr": "Chromosome"})
186             if "start" in geneFrame.columns:
187                 geneFrame = geneFrame.rename(columns={"start": "Start"})
188             if "end" in geneFrame.columns:
189                 geneFrame = geneFrame.rename(columns={"end": "End"})
190
191         ## Only keep regions which intersect with this subsetting region
```

```
192 overlappedForms = []
193 overlappedRanges = []
194 for item in prRanges:
195     loopRange = geneRange.intersect(item)
196     loopRange = loopRange.merge(strand=False)
197     loopFrame = loopRange.df
198
199     loopFrame["Size"] = loopFrame["End"] - loopFrame["Start"]
200
201     loopRange = pr.PyRanges(loopFrame)
202
203     overlappedForms.append(loopFrame)
204     overlappedRanges.append(loopRange)
205
206 prRanges = overlappedRanges
207 dataframeList = overlappedForms
208
209
210 print("Comparing cell regions between cell types: ")
211
212 ##this function loops through each cell type and compares it to every
... cell type with a lower index number than itself. the comparison is a
... simple overlap calculation, it then adds these values to its respective
... matrix
213 for i in range(len(dataFrameList)):
214
215     if( i != len(dataFrameList) - 1):
216         print("Cell Type " + str(i+1), end = " - ")
217     else:
218         print("Cell Type " + str(i+1), end = "\n")
219
220     for j in range(len(dataFrameList)):
221
222         if i > j:
223
224             loopRange = prRanges[i].intersect(prRanges[j])
225             if loopRange.df.empty:
226                 matrix1[i,j] = 1
227                 matrix1[j,i] = 1
228             else:
229                 overlap = sum(loopRange.End) - sum(loopRange.Start)
230                 sizeA = sum(prRanges[i].Size)
231                 sizeB = sum(prRanges[j].Size)
232
233                 weightValue = 1- ((overlap)/ (sizeA) *
... (overlap)/(sizeB))
```

```
234
235         matrix1[i,j] = weightValue
236
237         matrix1[j,i] = weightValue
238
239     ## If the user only included one atac-seq we need to skip steps which
... would fail with only atac, this includes making a dendrogram using scipy
240     if len(dataFrameList) > 1:
241         ##Create the first figure, the dendrogram of ATAC-seq datasets
242         distArray = ssd.squareform(matrix1)
243         plt.figure(figsize=(10, 16))
244         Z = scipy.cluster.hierarchy.linkage(distArray, method='single',
... metric='euclidean')
245         dn = dendrogram(Z, labels=cellNames, orientation = "left")
246         plt.savefig(outputLocation + '/cell_region_dendrogram.pdf',
... bbox_inches = "tight")
247     else:
248         print("You have only included one cell region set, this will omit
... the cell region dendrogram")
249
250     print("Formatting loci:")
251
252     ##Bring in our Loci sets
253     gwasFrame = 0
254
255     ## columns we wish to save
256     final_columns = ["CHR_ID", "Start", "CHR_POS", "End", "Chromosome",
... "DISEASE/TRAIT"]
257     if lociSelection != 0:
258
259         if lociSelection[-3:] == "tsv":
260             lociSelectDF=pd.read_csv(lociSelection,sep='\t')
261         elif lociSelection[-3:] == "csv":
262             lociSelectDF=pd.read_csv(lociSelection)
263         tempColumnList = lociSelectDF.columns
264         final_columns.extend(tempColumnList)
265
266
267
268     ##add GWAS in tsv format
269     for filename in glob.glob(gwasLocation + "/" + '*.tsv'):
270         loopFrame = pd.read_csv(filename, sep="\t", low_memory=False)
271
272         ## give a backup id by file count, in case they dont have an
... identity column
273         s = filename[:-4]
```

```
274     loopFrame["fileId"] = (s[s.rindex('/')+1:])
275
276     loopFrame = loopFrame[(loopFrame[loopFrame.columns[0]].notna()) &
... (loopFrame[loopFrame.columns[1]].notna())]
277
278     ##These if statements are to account for various formatting
... mistakes
279     if "DISEASE/TRAIT" not in loopFrame.columns:
280         loopFrame["DISEASE/TRAIT"] = loopFrame["fileId"]
281     if "Start" in loopFrame.columns:
282         loopFrame["CHR_POS"] = loopFrame["Start"].astype(int)
283     if "start" in loopFrame.columns:
284         loopFrame["CHR_POS"] = loopFrame["start"].astype(int)
285     if "Reference_name" in loopFrame.columns:
286         loopFrame["Chromosome"] = loopFrame["Reference_name"]
287         loopFrame["CHR_ID"] = loopFrame["Reference_name"]
288     if "reference_name" in loopFrame.columns:
289         loopFrame["Chromosome"] = loopFrame["reference_name"]
290         loopFrame["CHR_ID"] = loopFrame["reference_name"]
291     if "Chromosome" in loopFrame.columns:
292         loopFrame["CHR_ID"] = loopFrame["Chromosome"]
293     if "chr" in loopFrame.columns:
294         loopFrame["CHR_ID"] = loopFrame["chr"]
295
296     loopFrame["Chromosome"] = loopFrame["CHR_ID"]
297
298     ##if gwas is missing chr part of chromosome ids than add it
299     if (1 in loopFrame.Chromosome.unique()) or ('1' in
... loopFrame.Chromosome.unique()):
300         loopFrame["Chromosome"] = "chr" +
... loopFrame["Chromosome"]
301
302
303     if not isinstance(gwasFrame, pd.DataFrame):
304
... loopFrame.drop(columns=loopFrame.columns.difference(final_columns),
... inplace=True)
305         loopFrame = loopFrame[pd.to_numeric(loopFrame['CHR_POS'],
... errors='coerce').notnull()]
306         loopFrame['CHR_ID'] = loopFrame['CHR_ID'].astype('category')
307         gwasFrame = loopFrame
308     else:
309
... loopFrame.drop(columns=loopFrame.columns.difference(final_columns),
... inplace=True)
310         loopFrame = loopFrame[pd.to_numeric(loopFrame['CHR_POS'],
```



```
310... errors='coerce').notnull()]
311     loopFrame['CHR_ID'] = loopFrame['CHR_ID'].astype('category')
312     gwasFrame = pd.concat([gwasFrame, loopFrame],axis=0,
... ignore_index=True)
313
314
315     ## add GWAS in csv format
316     for filename in glob.glob(gwasLocation + "/" + '*.csv'):
317
318         loopFrame = pd.read_csv(filename, low_memory=False)
319
320         ## give a backup id by file count, in case they dont have an
... identity column
321         s = filename[:-4]
322         loopFrame["fileId"] = (s[s.rindex('/')+1:])
323
324         loopFrame = loopFrame[(loopFrame[loopFrame.columns[0]].notna()) &
... (loopFrame[loopFrame.columns[1]].notna())]
325
326
327         ##These if statements are to account for various formatting
... mistakes
328         if "DISEASE/TRAIT" not in loopFrame.columns:
329             loopFrame["DISEASE/TRAIT"] = loopFrame["fileId"]
330         if "Start" in loopFrame.columns:
331             loopFrame["CHR_POS"] = loopFrame["Start"].astype(int)
332         if "start" in loopFrame.columns:
333             loopFrame["CHR_POS"] = loopFrame["start"].astype(int)
334         if "Reference_name" in loopFrame.columns:
335             loopFrame["Chromosome"] = loopFrame["Reference_name"]
336             loopFrame["CHR_ID"] = loopFrame["Reference_name"]
337         if "reference_name" in loopFrame.columns:
338             loopFrame["Chromosome"] = loopFrame["reference_name"]
339             loopFrame["CHR_ID"] = loopFrame["reference_name"]
340         if "Chromosome" in loopFrame.columns:
341             loopFrame["CHR_ID"] = loopFrame["Chromosome"]
342         if "chr" in loopFrame.columns:
343             loopFrame["CHR_ID"] = loopFrame["chr"]
344
345         loopFrame["Chromosome"] = loopFrame["CHR_ID"]
346
347         ##if gwas is missing chr part of chromosome ids than add it
348         if (1 in loopFrame.Chromosome.unique()) or ('1' in
... loopFrame.Chromosome.unique()):
349             loopFrame["Chromosome"] = "chr" +
... loopFrame["Chromosome"]
```

```
350
351     if not isinstance(gwasFrame, pd.DataFrame):
352
... loopFrame.drop(columns=loopFrame.columns.difference(final_columns),
... inplace=True)
353         loopFrame = loopFrame[pd.to_numeric(loopFrame['CHR_POS'],
... errors='coerce').notnull()]
354         loopFrame['CHR_ID'] = loopFrame['CHR_ID'].astype('category')
355         gwasFrame = loopFrame
356     else:
357
... loopFrame.drop(columns=loopFrame.columns.difference(final_columns),
... inplace=True)
358         loopFrame = loopFrame[pd.to_numeric(loopFrame['CHR_POS'],
... errors='coerce').notnull()]
359         loopFrame['CHR_ID'] = loopFrame['CHR_ID'].astype('category')
360         gwasFrame = pd.concat([gwasFrame, loopFrame],axis=0,
... ignore_index=True)
361
362     if not isinstance(gwasFrame, pd.DataFrame):
363         sys.exit("No Loci files found")
364
365     ##format our Loci frame by getting rid of NAN values and then getting
... rid of studies with non-numerical chromosome positions, if you want to
... fix these chromosome positions manually, you can
366     print("Removing Empty Loci Values:")
367     gwasNoNAN = gwasFrame[(gwasFrame["CHR_POS"].notna()) &
... (gwasFrame["DISEASE/TRAIT"].notna())]
368
369     gwasNoNAN = gwasNoNAN.reset_index(drop=True)
370
371     ## Location to save all non-numeric indexes
372     nonNumericIndexes = []
373
374     ## if chromosome position isn't an integer than check for non-int
... rows to remove or try to force into int
375     if gwasNoNAN["CHR_POS"].dtype != np.int64:
376         print("Non integer chromosome positions detected, these will be
... removed")
377     for index, row in gwasNoNAN.iterrows():
378         if isinstance(gwasNoNAN.at[index, "CHR_POS"], float):
379             gwasNoNAN.at[index, "CHR_POS"] = int(gwasNoNAN.at[index,
... "CHR_POS"])
380         elif isinstance(gwasNoNAN.at[index, "CHR_POS"], str):
381             if gwasNoNAN.at[index, "CHR_POS"].isdigit():
382                 gwasNoNAN.at[index, "CHR_POS"] =
```

```
382... int(gwasNoNAN.at[index, "CHR_POS"])
383         else:
384             nonNumericIndexes.append(index)
385     elif not np.issubdtype(gwasNoNAN.at[index, "CHR_POS"], int):
386         nonNumericIndexes.append(index)
387
388     ## Drop indexes of values that couldnt be forced into integer
389     gwasFormatted = gwasNoNAN.drop(index=nonNumericIndexes)
390
391     ##Create columns for turning into pyranges
392     gwasFormatted["Start"] = gwasFormatted["CHR_POS"]
393     if "End" not in gwasFrame.columns:
394         gwasFormatted["End"] = gwasFormatted["CHR_POS"] + 1
395     if "Chromosome" not in gwasFrame.columns:
396         temp = '\t'.join(gwasFrame.CHR_ID.unique())
397         if "chr" not in temp:
398             gwasFormatted["Chromosome"] = "chr" +
... gwasFormatted["CHR_ID"].astype(str)
399         else:
400             gwasFormatted["Chromosome"] =
... gwasFormatted["CHR_ID"].astype(str)
401
402     ##if the length is zero give it a 1 length
403     gwasFormatted.loc[gwasFormatted.Start == gwasFormatted.End, "End"] =
... gwasFormatted.loc[gwasFormatted.Start == gwasFormatted.End, "End"] + 1
404
405     ## Subset by loci selection if given
406     if lociSelection != 0:
407         gwasNames = []
408
409         eachLociFrame = []
410         columnList = lociSelectDF.columns
411         for index, row in lociSelectDF.iterrows():
412             temp = lociSelectDF.iloc[[index]]
413             dtName = str(list(temp[columnList[0]])[0])
414             lociLoopFrame = gwasFormatted[gwasFormatted[columnList[0]] ==
... list(temp[columnList[0]])[0]]
415             for item in columnList:
416                 lociLoopFrame = lociLoopFrame[lociLoopFrame[item] ==
... list(temp[item])[0]]
417                 dtName = dtName + str(list(temp[item])[0])
418             eachLociFrame.append(lociLoopFrame)
419             gwasNames.append(dtName)
420             if lociLoopFrame.shape[0] == 0:
421                 print(dtName)
422                 sys.exit("One of the user given loci groups does not
```

```
422... exist")
423
424
425
426   ### rename the Disease/Trait column to more easily callable DT column
427   gwasFormatted = gwasFormatted.rename(columns={"DISEASE/TRAIT": "DT"})
428
429   ## subset loci based on cutoff value
430   if lociCutoff != 0:
431
432       print("Subsetting loci based on user-defined count:")
433       vc = gwasFormatted.DT.value_counts()
434       highCount = list(vc[vc > int(lociCutoff)].index)
435       gwasFormatted =
... gwasFormatted[(gwasFormatted["DT"].isin(highCount))]
436
437   ##save pyranges for each disease/trait
438   print("Turning GWAS into Pyranges Objects:")
439   gwasPyranges = []
440   gwasNonZeroPyranges = []
441   indels = False
442
443   if lociSelection == 0:
444       gwasNames = list(set(gwasFormatted["DT"]))
445       for item in set(gwasFormatted["DT"]):
446
447           ##subset for each loci type
448           loopFrame = gwasFormatted[(gwasFormatted["DT"] == item)]
449
450           ##remove duplicate loci
451           loopFrame = loopFrame.drop_duplicates(subset=['CHR_ID',
... 'Start', 'End'])
452
453           ##Subset into appropriate columns and add to our list of
... final loci ranges
454           tempRange = pr.PyRanges(loopFrame)
455           loopRange = tempRange
456           df = pd.DataFrame(list(zip(loopRange.Chromosome,
... loopRange.Start, loopRange.End)), columns=['Chromosome', 'Start', 'End'])
457           df["Size"] = df["End"] - df["Start"]
458           dfSingle = df[df["Size"] <= 1]
459           testRange = pr.PyRanges(dfSingle)
460           gwasPyranges.append(testRange)
461
462           ##If there are indels we need to create range including all
... these larger than 1 bp loci, otherwise mark that it is blank
```

```
463         if df.Size.max() > 1:
464             print("Indels Detected in " + item + ", Statistical
... Method For Loci >1 bp Will Be Applied")
465             indels = True
466             df = df[df["Size"] > 1]
467             indelLoopRange = pr.PyRanges(df)
468             gwasNonZeroPyranges.append(indelLoopRange)
469         else:
470             gwasNonZeroPyranges.append([])
471
472     else:
473         for countIndel, item in enumerate(eachLociFrame):
474
475             ##remove duplicate loci
476             loopFrame = item.drop_duplicates(subset=['CHR_ID', 'Start',
... 'End'])
477
478             ##Subset into appropriate columns and add to our list of
... final loci ranges
479             tempRange = pr.PyRanges(loopFrame)
480             loopRange = tempRange
481             df = pd.DataFrame(list(zip(loopRange.Chromosome,
... loopRange.Start, loopRange.End)), columns=['Chromosome', 'Start', 'End'])
482             df["Size"] = df["End"] - df["Start"]
483             dfSingle = df[df["Size"] <= 1]
484             testRange = pr.PyRanges(dfSingle)
485             gwasPyranges.append(testRange)
486
487             ##If there are indels we need to create range including all
... these larger than 1 bp loci, otherwise mark that it is blank
488             if df.Size.max() > 1:
489                 print("Indels Detected in " + gwasNames[countIndel] +
... "Statistical Method For Loci >1 BP Will Be Applied")
490                 indels = True
491                 df = df[df["Size"] > 1]
492                 indelLoopRange = pr.PyRanges(df)
493                 gwasNonZeroPyranges.append(indelLoopRange)
494             else:
495                 gwasNonZeroPyranges.append([])
496
497             ##Create a reordered list of our ATAC-sets based on how they showed
... up in the dendrogram. This step will be skipped if there is only one
... ATAC-seq set
498             reorderPyranges = []
499             reorderDataframeList = []
500             reorderCellNames = []
```

```
501     if len(dataFrameList) > 1:
502         ## using the leaves from our scipy Z set, resort your pyranges
... and dataframes to be in the correct order
503         for item in reversed(leaves_list(Z)):
504             reorderPyranges.append(prRanges[item])
505             reorderDataframeList.append(dataFrameList[item])
506             reorderCellNames.append(cellNames[item])
507     else:
508         reorderPyranges = prRanges
509         reorderDataframeList = dataFrameList
510
511     ## create matrices to store p-values and overlap information
512     heatmapMatrix = np.zeros((len(reorderPyranges), len(gwasPyranges)))
513     overlapMatrix = np.zeros((len(reorderPyranges), len(gwasPyranges)))
514
515     ## create the chromosome ratios for every atac-seq set
516     chromSize = pd.read_csv(chromosomeSize, thousands=',')
517     chromSize = chromSize.sort_values(by=['Chromosome'])
518
519
520     ##create weight matrix
521
522     ##Based on window sizes divide our chromosomes into equal sized
... chunks
523     windowFrames = []
524     for index, row in chromSize.iterrows():
525
526         ## get the size of this particular chromosome
527         chrSize = int(chromSize.at[index, "size in bp"])
528
529         ## returned the rounded up version of the divided window size
... (3.01 becomes 4)
530         n = math.ceil(chrSize/windowSize)
531
532         windowSizesLoop = []
533         zp = n - (chrSize % n)
534         pp = chrSize//n
535         for i in range(n):
536             if(i>= zp):
537                 windowSizesLoop.append(pp + 1)
538             else:
539                 windowSizesLoop.append(pp)
540
541         chrWindowDF = pd.DataFrame(windowSizesLoop, columns=['Size'])
542         chrWindowDF["End"] = chrWindowDF["Size"].cumsum()
543         chrWindowDF["Start"] = chrWindowDF["End"] - chrWindowDF["Size"] +
```

```
543... 1
544     chrWindowDF.at[0,"Start"] = chrWindowDF.at[0,"Start"] -1
545     chrWindowDF["Chromosome"] = chromSize.at[index, "Chromosome"]
546
547     windowFrames.append(chrWindowDF)
548
549     allWindowsDF = pd.concat(windowFrames)
550
551     ## find overlaps and probability for each ATAC + GWAS
552     listOverlaps = []
553     overlapAllColumns = []
554
555     windowsRange = pr.PyRanges(allWindowsDF)
556     windowStarts = list(allWindowsDF.Start)
557     windowEnds = list(allWindowsDF.End)
558     windowChrs = list(allWindowsDF.Chromosome)
559     dictWindows = {"Start":windowStarts, "End":windowEnds,
... "Size":list(allWindowsDF.Size), "Chromosome":windowChrs}
560
561     print("Calculating Overlaps: ")
562     if indels == True:
563         print("Note: Indels significantly effect runtime")
564     for count, item in enumerate(reorderPyranges):
565
566         if( count != len(reorderPyranges) - 1):
567             print(reorderCellNames[count], end = " - ")
568         else:
569             print(reorderCellNames[count], end = "\n")
570
571         tempRange = windowsRange.coverage(item)
572         dictWindows[reorderCellNames[count]] =
... list(tempRange.FractionOverlaps)
573
574         ##if there are indels then save the number of atac peaks per each
... window, this will be need for calculations at the end
575         if indels == True:
576             dictWindows[reorderCellNames[count] + "PeakCount"] =
... list(tempRange.NumberOverlaps)
577
578         ##find the number of overlaps
579         for count2, item2 in enumerate(gwasPyranges):
580             tempRange2 = windowsRange.coverage(item2)
581             dictWindows[reorderCellNames[count] + gwasNames[count2]] =
... list(tempRange2.NumberOverlaps)
582
583         ## If Indels exist we need to do some more expansive
```

```
583... calculations
584         if indels == True:
585
586             ## if indels exist in this particular gwas set continue
... on to indel caluclations
587             if gwasNonZeroPyranges[count2]:
588
589                 ##Grab all indels that overlap with the current ATAC
... set
590                 indelRangeTemp =
... gwasNonZeroPyranges[count2].coverage(item)
591                 indelOverlap = indelRangeTemp.df
592
593                 ## keep only those that overlap
594                 indelOverlap =
... indelOverlap[indelOverlap["NumberOverlaps"] > 0]
595
596                 ##now create a list of every bp where an indel exists
... at
597                 indelOverlap = indelOverlap.reset_index(drop=True)
598                 indelOverlap['range']=indelOverlap.apply(lambda x :
... list(range(x['Start'],x['End'])),1)
599                 indelChroDict = {}
600                 for item in list(set(indelOverlap.Chromosome)):
601                     indelChroLoop =
... indelOverlap[indelOverlap["Chromosome"] == item]
602                     indelLoopLocations = [item for sublist in
... indelChroLoop["range"] for item in sublist]
603                     indelChroDict[item] = indelLoopLocations
604
605                 indelExtraOverlap = []
606
607                 ##Get the number of these overlaps for each window so
... we can add them to the count
608                 indelDoubleOverlap = indelOverlap.drop(['range',
... 'NumberOverlaps'], axis=1)
609                 indelDoubleOverlap = pr.PyRanges(indelDoubleOverlap)
610                 doubleOverlapCount =
... windowsRange.coverage(indelDoubleOverlap)
611                 doubleOverlapList =
... list(doubleOverlapCount.NumberOverlaps)
612
613                 ## for each window space, find how much length of
... indel exists in the window
614                 for windowCount, windowItem in
... enumerate(windowStarts):
```



```
615
616         if windowChrs[windowCount] in indelChroDict:
617             indelWindowSize = [num for num in
... indelChroDict[windowChrs[windowCount]] if num <= windowEnds[windowCount]
... and num >= windowStarts[windowCount]]
618         else:
619             indelWindowSize = []
620
621         ## if none exist, add zero to list of indel
... overlap, if it does add the total number of bp that do
622         if len(indelWindowSize) == 0:
623             indelExtraOverlap.append(0)
624         else:
625             indelSize = len(indelWindowSize)
626             indelExtraOverlap.append(indelSize)
627
628         ##grab the number of peaks per window
629         listCount = dictWindows[reorderCellNames[count] +
... "PeakCount"]
630
631         ##multiply the extra length we need to add to every
... atac peak within every window
632         listSize = [a*b for a,b in
... zip(listCount,indelExtraOverlap)]
633
634         ## take this extra size to calculate an added
... probability
635         listProb = [a/b for a,b in zip(listSize,
... dictWindows["Size"])]
636
637         ##Add this probability to the base probability for a
... gwas specific probability
638         dictWindows[reorderCellNames[count]+
... gwasNames[count2] + "Prob"] = [a+b for a,b in
... zip(dictWindows[reorderCellNames[count]], listProb)]
639
640         ##Add number of indel overlaps
641         dictWindows[reorderCellNames[count] +
... gwasNames[count2] + "IndelOverlap"] = doubleOverlapList
642
643         ## Get the total number of indels in region to add to
... count
644         totalIndelRange =
... windowsRange.coverage(gwasNonZeroPyranges[count2])
645         totalIndelList = list(totalIndelRange.NumberOverlaps)
646
```

```
647         ## add the count of indels to the original gwas count
648         dictWindows[reorderCellNames[count] +
... gwasNames[count2]] = [a+b for a,b in
... zip(dictWindows[reorderCellNames[count] + gwasNames[count2]],
... totalIndelList)]
649
650
651     ## check to see if you can make a subfolder
652     if not os.path.exists(outputLocation+ '/overlaps'):
653         os.mkdir(outputLocation + '/overlaps')
654         if not os.path.exists(outputLocation + '/overlaps'):
655             print("Output folder cannot be modified, so overlaps will not
... be saved. Try running again with higher permissions.")
656             overlapSave = False
657         else:
658             overlapSave = True
659     else:
660         overlapSave = True
661
662     print("Calculating P-Values: ")
663     for count, item in enumerate(reorderPyranges):
664
665         if( count != len(reorderPyranges) - 1):
666             print(reorderCellNames[count], end = " - ")
667         else:
668             print(reorderCellNames[count], end = "\n")
669
670         for count2, item2 in enumerate(gwasPyranges):
671             overlapCoverage = item.coverage(item2)
672             if overlapSave:
673                 overlapCoverageFrame = overlapCoverage.df
674                 overlapCoverageFrame =
... overlapCoverageFrame[overlapCoverageFrame["NumberOverlaps"] != 0]
675                 overlapCoverageFrame.to_csv(outputLocation + '/overlaps'
... + '/overlap_' + gwasNames[count2][:10] + '_' +
... reorderCellNames[count][:10] + '.txt',sep='\t')
676                 overlapValue = sum(list(item.coverage(item2).NumberOverlaps))
677                 overlapMatrix[count,count2] = overlapValue
678                 if indels == True:
679                     overlapValue = overlapValue +
... sum(dictWindows[reorderCellNames[count] + gwasNames[count2] +
... "IndelOverlap"])
680
681
682         ## if there are not indels, use the normal probabilities, if
... there are indels, use the gwas specific window probabilitites
```

```
683         if indels == False:
684             out1, out2 = zip(*filter(all,
... zip(list(dictWindows[reorderCellNames[count] + gwasNames[count2])),
... list(dictWindows[reorderCellNames[count]])))
685             elif gwasNonZeroPyranges[count2]:
686                 out1, out2 = zip(*filter(all,
... zip(list(dictWindows[reorderCellNames[count] + gwasNames[count2])),
... list(dictWindows[reorderCellNames[count]+ gwasNames[count2] + "Prob"])))
687             else:
688                 out1, out2 = zip(*filter(all,
... zip(list(dictWindows[reorderCellNames[count] + gwasNames[count2])),
... list(dictWindows[reorderCellNames[count]])))
689
690             ## since psinib is a statistical method, sometimes root
... function finds results well outside the region near 0, this check
... accomodates this by turning all values over 1 into 1
691             valueSinib = psinib(overlapValue-1, out1, out2,
... lowerTail=False)
692             if valueSinib <= 1:
693                 heatmapMatrix[count,count2] = valueSinib
694             else:
695                 print("P-Value equal greater than one found. note: Sinib
... sometimes uses a statistical approximation of a p-value for non
... convergent cases, this can allow for impossible p-values. These values
... are set to 1 in results.")
696                 heatmapMatrix[count,count2] = 1
697             try:
698                 print("Lowest P-Value: " + str(heatmapMatrix.min()))
699             except ValueError:
700                 pass
701             try:
702                 if heatmapMatrix.max() > 1:
703                     print("P-Value greater than one found in final matrix.")
704             except ValueError:
705                 pass
706
707
708             newHeatMatrix = heatmapMatrix
709             ax = sns.heatmap(newHeatMatrix,
... cmap="YlGnBu",annot=True,xticklabels=gwasNames)
710             ax.xaxis.set_ticks_position('top')
711             ax.xaxis.set_label_position('top')
712             plt.xticks(rotation=90)
713             plt.savefig(outputLocation + '/pvalues_heatmap.pdf', bbox_inches =
... "tight")
714
```

```
715     ## Create the final figure
716     figure, axis = plt.subplots(2, 2, figsize=(40, 30))
717     sns.heatmap(newHeatMatrix, cmap="YlGnBu", cbar=False, ax=axis[1,
... 1],xticklabels=gwasNames)
718     axis[1, 1].xaxis.set_ticks_position('top')
719     axis[1, 1].xaxis.set_label_position('top')
720     plt.xticks(rotation=90)
721     sns.heatmap(newHeatMatrix, cmap="YlGnBu", annot=True, ax=axis[0, 0])
722
723     axis[0, 1].grid(False)
724     axis[0, 1].axis('off')
725     if len(dataFrameList) > 1:
726         dendrogram(Z, labels=cellNames, orientation = "left", ax=axis[1,
... 0])
727     else:
728         axis[1, 0].text(0.1, 0.5, cellNames[0],
... horizontalalignment='right', verticalalignment='center',
... transform=axis[1, 0].transAxes)
729         axis[1, 0].grid(False)
730         axis[1, 0].axis('off')
731         axis[1, 1].margins(x=0)
732         plt.savefig(outputLocation + '/complete_figure.pdf', bbox_inches =
... "tight")
733
734     ##save the matrix of p-values in case they want to do something else
... with the formatting
735     newHeatFrame = pd.DataFrame(newHeatMatrix)
736     newHeatFrame.columns = gwasNames
737     if len(dataFrameList) > 1:
738         newHeatFrame.index = reorderCellNames
739     else:
740         newHeatFrame.index = cellNames
741
742     newHeatFrame.to_csv(outputLocation + '/pvalue_matrix.txt',sep='\t')
743
744
745     ##save overlap Counts
746     newOverlapMatrix = overlapMatrix
747
748     ## save the matrix of overlaps count in case they want to do
... something else with the formatting
749     newOverlapFrame = pd.DataFrame(newOverlapMatrix)
750     newOverlapFrame.columns = gwasNames
751     if len(dataFrameList) > 1:
752         newOverlapFrame.index = reorderCellNames
753     else:
```

```
754         newOverlapFrame.index = cellNames
755
756         ## save the matrix of overlap counts in case this information is
... desired
757         newOverlapFrame.to_csv(outputLocation +
... '/overlap_count_matrix.txt', sep='\t')
758
759
760
761 ## Sinib Package Functions
762 ## translated from R to Python from: https://github.com/boxiangliu/sinib
763
764 def q(u,p):
765     return([(i * math.exp(u)) / (1 - i + i * math.exp(u)) for i in p])
766
767 def K(u,n,p):
768     return(sum([a*math.log(1-b+b*math.exp(u)) for a,b in zip(n,p)]))
769
770 def Kp(u,n,p):
771     return(sum([a*b for a,b in zip(n,q(u,p))]))
772
773 def Kpp(u,n,p):
774     q2=q(u,p)
775     return(sum([a*b*(1-b) for a,b in zip(n,q2)]))
776
777 def Kppp(u,n,p):
778     q2=q(u,p)
779     return(sum([a*b*(1-b)*(1-2*b) for a,b in zip(n,q2)]))
780
781 def Kpppp(u,n,p):
782     q2=q(u,p)
783     return(sum([a*b*(1-b)*(1-6*b*(1-b)) for a,b in zip(n,q2)]))
784
785 def saddlepoint(u,n,p,s):
786     return(Kp(u,n,p)-s)
787
788 def w(u,n,p):
789     K2=K(u,n,p)
790     Kp2=Kp(u,n,p)
791     return(np.sign(u)*math.sqrt(2*u*Kp2-2*K2))
792
793 def u1(u,n,p):
794     Kpp2=Kpp(u,n,p)
795     return((1-math.exp(-u))*math.sqrt(Kpp2))
796
797 def p3(u,n,p,s,mu):
```

```
798     w2=w(u,n,p)
799     u12=u1(u,n,p)
800     if ((u12==0.0) or (s==mu)):
801         Kpp0=sum([a*b*(1-b) for a,b in zip(n,p)])
802         Kppp0=sum([a*b*(1-b)*(1-2*b) for a,b in zip(n,p)])
803
... return(1/2-(2*np.pi)**(-1/2)*((1/6)*Kppp0*Kpp0**(-3/2)-(1/2)*Kpp0**(-1/2)
... ))
804
805     else:
806         return(1-norm.cdf(w2)-norm.pdf(w2)*(1/w2-1/u12))
807
808
809 def u2(u,n,p):
810     return(u*math.sqrt(Kpp(u,n,p)))
811
812 def k3(u,n,p):
813     return(Kppp(u,n,p)*Kpp(u,n,p)**(-3/2))
814
815 def k4(u,n,p):
816     return(Kpppp(u,n,p)*Kpp(u,n,p)**(-2))
817
818 def p4(u,n,p,s,mu):
819
820     u2b=u2(u,n,p)
821     k3b=k3(u,n,p)
822     k4b=k4(u,n,p)
823     wb=w(u,n,p)
824     p3b=p3(u,n,p,s,mu)
825     u1b=u1(u,n,p)
826     if ((u1b==0) or (s==mu)):
827         return(p3b)
828     else:
829
... return(p3b-norm.pdf(wb)*((1/u2b)*((1/8)*k4b-(5/24)*k3b**2)-1/(u2b**3)-k3b
... /(2*u2b**2)+1/wb**3))
830
831 def calc_p4(s, n, p, mu):
832     if (s == sum(n)):
833         p4b=numpy.prod([a**b for a,b in zip(p,n)])
834     else:
835         test = root(lambda x: saddlepoint(x,n,p,s), 0)
836         u_hat = test.x[0]
837         if not test.success:
838             n_trial=100000
839             n_binom=len(p)
```

```
840         mat = np.random.binomial(n, p, (n_trial, n_binom)).T
841
842         S = np.sum(mat,axis=0)
843         counterTemp = 0
844         s = [s]*len(S)
845         for l1,l2 in zip(S,s):
846             if l1 >= l2:
847                 counterTemp = counterTemp + 1
848             p4_ = counterTemp/len(S)
849         else:
850             p4_=p4(u_hat,n,p,s,mu)
851
852         return(p4_)
853
854 def psinib(q,size,prob,lowerTail=True,logP=False):
855
856     if(not all(isinstance(x, int) for x in size)):
857         sys.exit('Non-integer values were used for size values given to
... psinib')
858     if not all(isinstance(x, int) for x in size):
859         n = [int(i) for i in size]
860     else:
861         n = [int(i) for i in size]
862
863     p = [float(i) for i in prob]
864     s = int(q)
865
866     mu = sum([a*b for a,b in zip(n,p)])
867
868     p4b = calc_p4(s+1,n,p, mu)
869
870     if(lowerTail):
871         if (logP):
872             return(np.log(1-p4b))
873         else:
874             return(1-p4b)
875
876     else:
877         if(logP):
878             return(np.log(p4b))
879         else:
880             return(p4b)
881
882 ## Main Function which parses arguments and returns values
883
884 def main():
```

```
885
886     ## parse the given arguments to see if the necessary libraries have
... been given and
887     parser = argparse.ArgumentParser(prog = 'gaia',
888                                     description = 'Compare ATAC-seq data
... to loci.')
889
890     parser.add_argument('-a', '--cellRegion', required = True,
891                         help='the folder location of the cell region bed
... files stored in .txt format')
892     parser.add_argument('-g', '--loci', required = True,
893                         help='the folder location of the loci files
... stored in .tsv format')
894     parser.add_argument('-c', '--chrom', required = True,
895                         help='the location of the chromosome size file
... stored in a .csv format')
896     parser.add_argument('-o', '--output', required = True,
897                         help='the folder location you want the results to
... be output into')
898     parser.add_argument('-u', '--peakUniqueness', default=0, required =
... False, type=int,
899                         help='a cutoff value for ATAC uniqueness (e.g. if
... given 12, then any atac peak found in more than 12 atac sets will be
... removed from all of them) - by default uniqueness is not considered')
900     parser.add_argument('-l', '--lociCutoff', default=0, required = False,
... type=int,
901                         help='a loci cutoff value, will only consider
... loci groups (phenotypes or cohorts) with more loci than this cutoff value
... - by default this cutoff is 0')
902     parser.add_argument('-s', '--specificLoci', default=0, required =
... False,
903                         help='a txt file with the specific loci phenotype
... you would like to use. This can be very helpful if using a large loci set
... with with many phenotypes, and you want to sort by more than just loci
... count.' )
904     parser.add_argument('-m', '--maskRegion', default=0, required = False,
905                         help='a txt file containing a set of regions that
... you want to subset each ATAC region by, for example a set of regions
... around the TSSs of genes of interest. This will reduce the ATAC regions
... to just those that overlap with this set of regions' )
906
907     parser.add_argument('-w', '--windowSize', default=100000, required =
... False, type=int,
908                         help='Size of the window you would like to create
... around each loci to make the statistical comparison for enrichment')
909
```



```
910
911     args = parser.parse_args()
912
913     gaiaAssociation(args.cellRegion, args.loci, args.chrom, args.output,
... args.peakUniqueness, args.lociCutoff, args.specificLoci, args.maskRegion,
... args.windowSize)
914
```
