# Supplementary material for: Regulatory landscape enrichment analysis (RLEA): a computational toolkit for non-coding variant enrichment and cell type prioritization
Source: Springer Nature journal article supplement (doi:10.1186/s12859-024-05794-7), 2024-05-07
Supplement: 12859_2024_5794_MOESM6_ESM.pdf [file 12859_2024_5794_MOESM6_ESM.pdf]

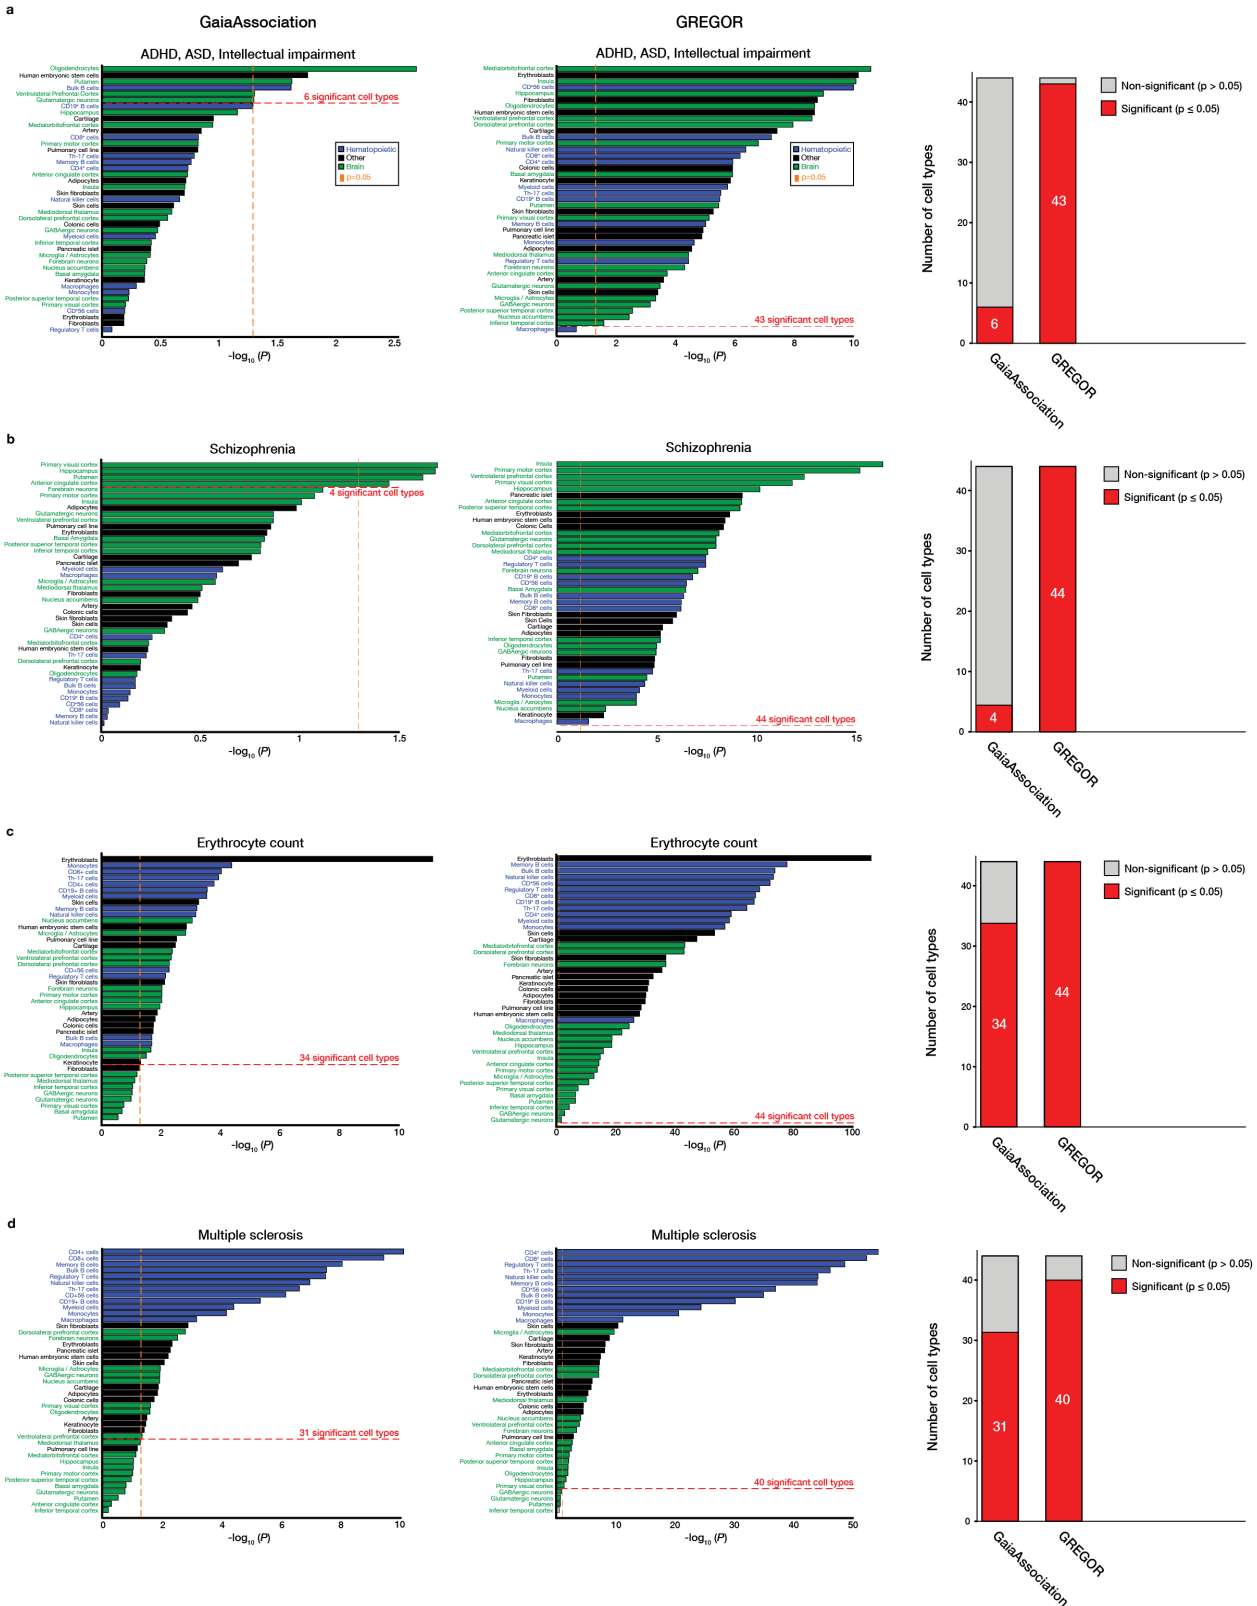

**Supplementary Figure 4: Comparative enrichment analysis between RLEA by GaiaAssociation and GREGOR. GaiaAssociation performance was compared against**

GREGOR using ATAC-seq regions from 44 cell types and the GWAS studies highlighted in **Figure 2b**. While there was a general concordance of enrichment for cell type rankings between the methods, GREGOR tended to show a non-specific enrichment in significance across most or all cell types, whereas GaiaAssociation was generally more selective, especially for the ADHD, ASD, and Intellectual impairment results in **(a)** and the schizophrenia results in **(b)**.
